# Supplementary material for: Optimized Recovery of Immature Germ Cells after Prepubertal Testicular Tissue Digestion and Multi-Step Differential Plating: A Step towards Fertility Restoration with Cancer-Cell-Contaminated Tissue
Source: MDPI journal article supplement (doi:10.3390/ijms25010521), 2023-12-30
Supplement: s1 [file s1]

**Table S1.** Measurements of weight and volume of obtained neonatal porcine testes. n=12.

| Testis        | Litter | Age (days) | Weight (mg)         | Volume ( $\mu$ L)   | Weight/volume ratio |
|---------------|--------|------------|---------------------|---------------------|---------------------|
| 1             | 3      | 3          | 791.8               | 650                 | 1.22                |
| 2             | 3      | 3          | 534.7               | 450                 | 1.19                |
| 3             | 3      | 3          | 479.2               | 400                 | 1.20                |
| 4             | 3      | 3          | 713.0               | 700                 | 1.02                |
| 5             | 5      | 3          | 684.2               | 900                 | 0.76                |
| 6             | 1      | 3          | 446.2               | 400                 | 1.12                |
| 7             | 1      | 3          | 713.1               | 800                 | 0.89                |
| 8             | 1      | 3          | 471.0               | 500                 | 0.94                |
| 9             | 2      | 3          | 539.5               | 600                 | 0.90                |
| 10            | 2      | 5          | 532.8               | 600                 | 0.89                |
| 11            | 4      | 5          | 739.6               | 850                 | 0.87                |
| 12            | 4      | 5          | 691.3               | 700                 | 0.99                |
| Mean $\pm$ SD |        |            | 611.37 $\pm$ 121.74 | 629.17 $\pm$ 169.84 | 1.00 $\pm$ 0.15     |
